# Supplementary material
Source: publisher site journal article supplement (http://www.degruyter.com/publication/journal_key/HTMP/downloadAsset/HTMP_CFP%20High-temperature%20Phase%20Change%20Materials%20for%20Energy%20Storage.pdf)
Supplement: Supplementary file 1 [file HTMP_CFP%20High-temperature%20Phase%20Change%20Materials%20for%20Energy%20Storage.pdf]

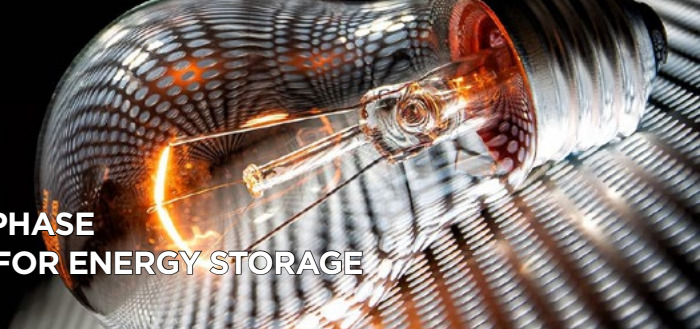

# HIGH-TEMPERATURE PHASE CHANGE MATERIALS FOR ENERGY STORAGE

## GUEST EDITORS

---

**Assoc. Prof. Takahiro Nomura**, Center for Advanced Research of Energy & Materials,  
Faculty of Engineering, Hokkaido University

[nms-tropy@eng.hokudai.ac.jp](mailto:nms-tropy@eng.hokudai.ac.jp)

**Assoc. Prof. Kenta Yamanaka**, Institute for Materials Research, Tohoku University

[kenta.yamanaka.c5@tohoku.ac.jp](mailto:kenta.yamanaka.c5@tohoku.ac.jp)

## DESCRIPTION

---

We are very excited to announce a new Topical Issue of High Temperature Materials and Processes for thermal energy storage materials. Recently, thermal energy storage has gained significant attention and has become a tidal current for utilizing renewable energy. High-temperature phase change material (PCM) is one of the critical topics to solve the energy problem. This topical issue aims to provide an opportunity for collecting some advanced works in the high-temperature PCM research areas, including technical research papers and review papers.

We welcome your original and unpublished articles on any aspect of high-temperature PCM for energy storage as well as its applications.

## HOW TO SUBMIT

---

Before submission authors should carefully read the **Instruction for Authors**:

[degruyter.com/publication/journal\\_key/HTMP/downloadAsset/HTMP\\_Instruction%20for%20Authors.pdf](https://degruyter.com/publication/journal_key/HTMP/downloadAsset/HTMP_Instruction%20for%20Authors.pdf)

In order to make the preparation of manuscript easier, you are advised to use the **Manuscript Template**: [degruyter.com/publication/journal\\_key/HTMP/downloadAsset/HTMP\\_Manuscript%20Template.docx](https://degruyter.com/publication/journal_key/HTMP/downloadAsset/HTMP_Manuscript%20Template.docx)

All submissions to the Topical Issue must be made electronically via the Editorial Manager submission and tracking review system: <https://www.editorialmanager.com/http/default.aspx>

All manuscripts will undergo the standard peer-review process (single-blind, at least two independent reviewers). When entering your submission via the online submission system please choose "Topical Issue: Materials for Energy Storage". Submission of a manuscript implies that the work described has not been published before and is not under consideration for publication anywhere else.

All accepted **review papers** in that Topical Issue will be published with a **50% discount**, and **mini-review papers (by the 6 pages)** will have a **30% discount**. Please post the **Storage\_REVIEW** keyword in the cover letter. For the authors of the **research papers**, we have prepared a **10% discount** to the APC (the keyword is **Storage\_RESEARCH**).

The deadline for submissions is **November 30, 2022**, but individual papers will be reviewed and published online on an ongoing basis.

Your benefits due to contribution to the Topical Issue:

- ▶ indexation in Web of Science, SCOPUS, and many other services
- ▶ convenient, web-based paper submission and tracking system – ScholarOne
- ▶ quick online publication upon completing the publishing process (continuous publication model)
- ▶ better visibility due to Open Access
- ▶ long-term preservation of the content (articles archived in Portico)
- ▶ extensive post-publication promotion for selected papers

In case of any further questions please contact the Managing Editor ([ewa.chmielewska@degruyter.com](mailto:ewa.chmielewska@degruyter.com)).
